# Supplementary material for: DNA Barcoding for Identification of ‘Candidatus Phytoplasmas’ Using a Fragment of the Elongation Factor Tu Gene
Source: PubMed Central journal article supplement (PMC3525539; doi:10.1371/journal.pone.0052092), 2012-12-18

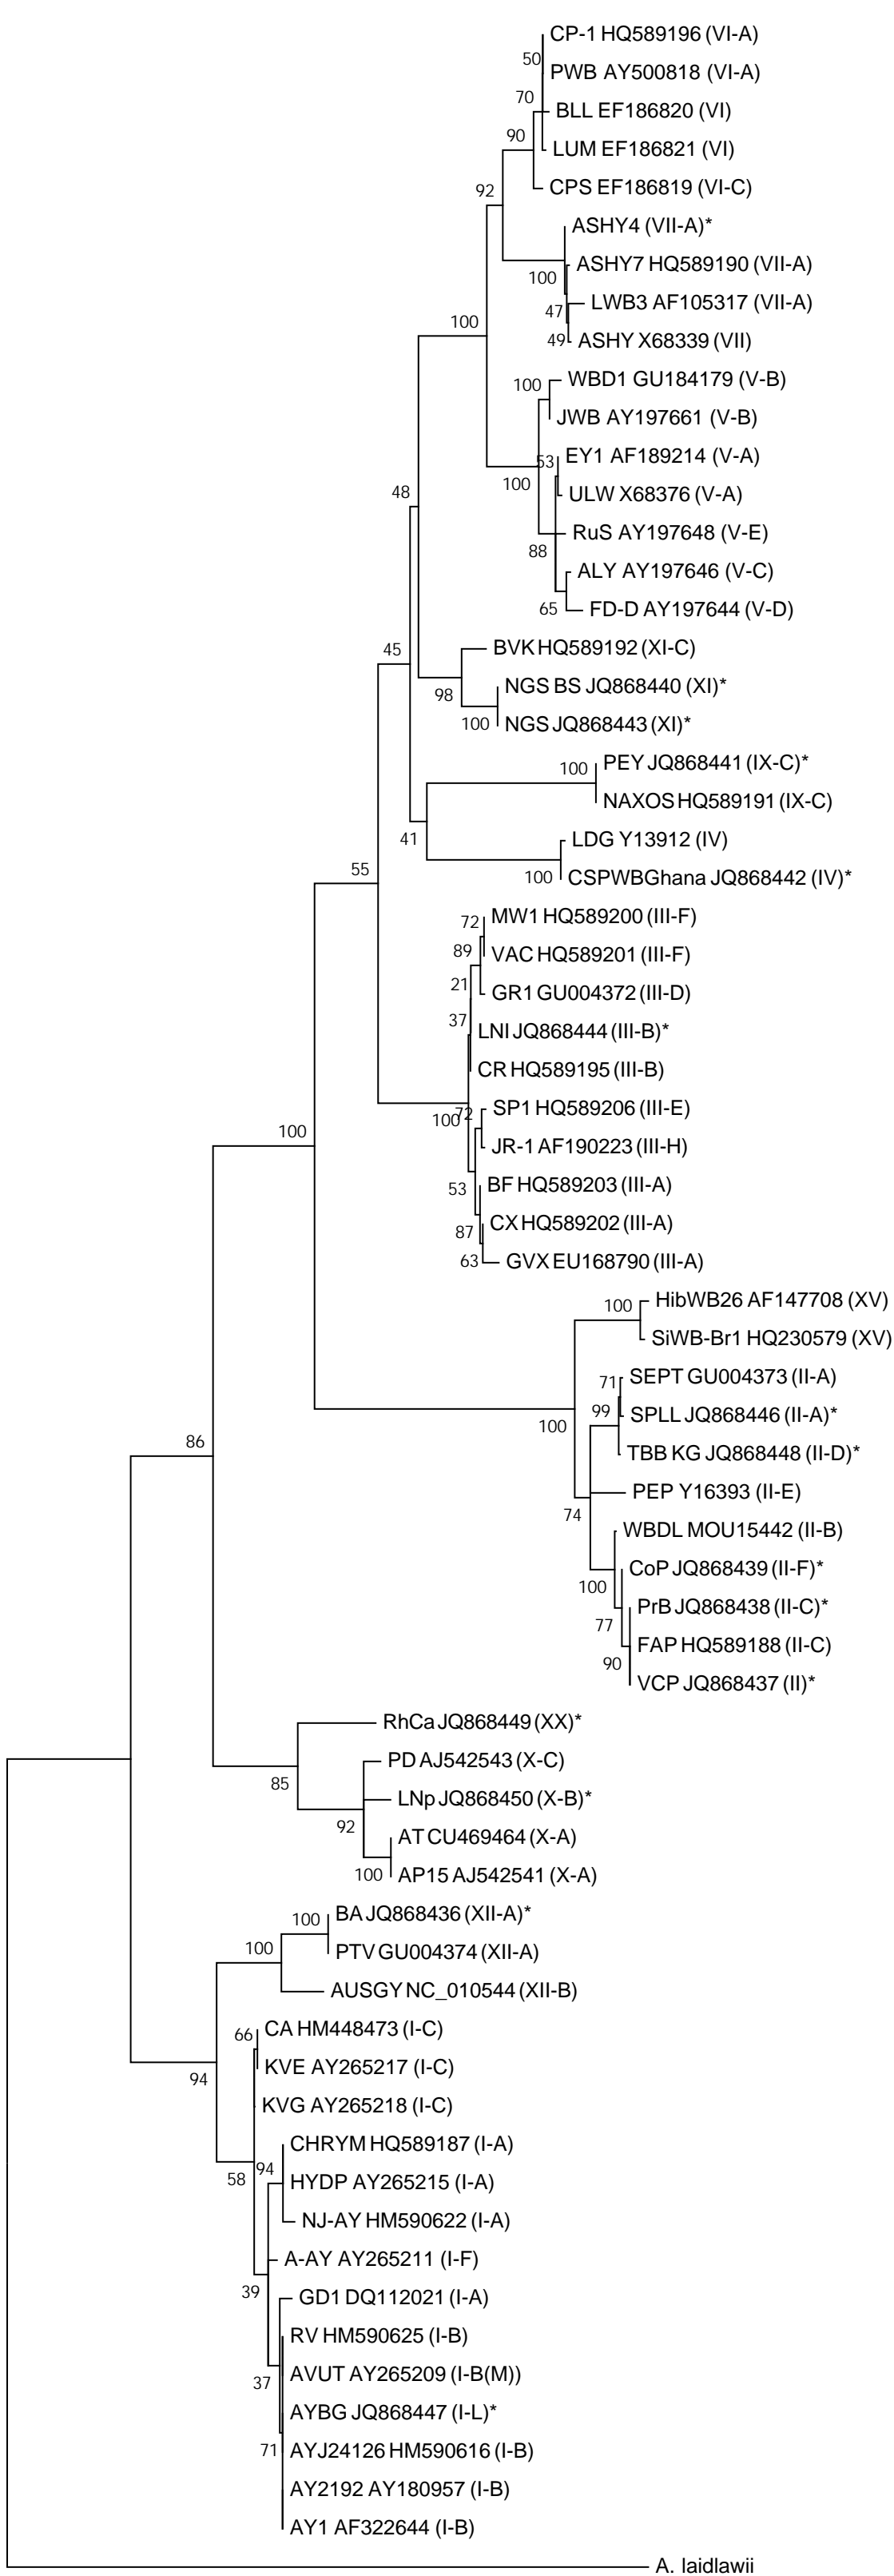

*A. laidlawii*

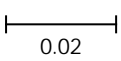

Supplement: pone.0052092.s002.pdf [file pone.0052092.s002.pdf]
